# Supplementary material for: Non-coding RNA-related FCGBP downregulation in head and neck squamous cell carcinoma: a novel biomarker for predicting paclitaxel resistance and immunosuppressive microenvironment
Source: PubMed Central journal article supplement (PMC10891054; doi:10.1038/s41598-024-55210-6), 2024-02-23
Supplement: 41598_2024_55210_MOESM1_ESM.pdf [file 41598_2024_55210_MOESM1_ESM.pdf]

**Non-coding RNA-related FCGBP downregulation in head and neck squamous cell carcinoma: A novel biomarker for predicting paclitaxel resistance and immunosuppressive microenvironment**

Qin Ding<sup>1,2†</sup>, Fengjie Lin<sup>1,2†</sup>, Zongwei Huang<sup>1,2†</sup>, Ying Li<sup>1,2</sup>, Sunqin Cai<sup>1,2</sup>, Xin Chen<sup>1,2</sup>, Hui Liu<sup>1,2\*</sup>, Sufang Qiu<sup>1,2\*</sup>

<sup>1</sup>Department of Radiation Oncology, Clinical Oncology School of Fujian Medical University, Fujian Cancer Hospital, Fuzhou, China

<sup>2</sup>Fujian Provincial Key Laboratory of Translational Cancer Medicine, Fuzhou, China

\*Correspondence: Sufang Qiu, [sufangqiu@fjmu.edu.cn](mailto:sufangqiu@fjmu.edu.cn), Department of Radiation Oncology, Clinical Oncology School of Fujian Medical University, Fujian Cancer Hospital, Fuzhou, 350014, China

Hui Liu, [liuhui@fjmu.edu.cn](mailto:liuhui@fjmu.edu.cn), Department of Radiation Oncology, Clinical Oncology School of Fujian Medical University, Fujian Cancer Hospital, Fuzhou, 350014, China

†These authors have contributed equally to this work.

## Supplementary Materials:

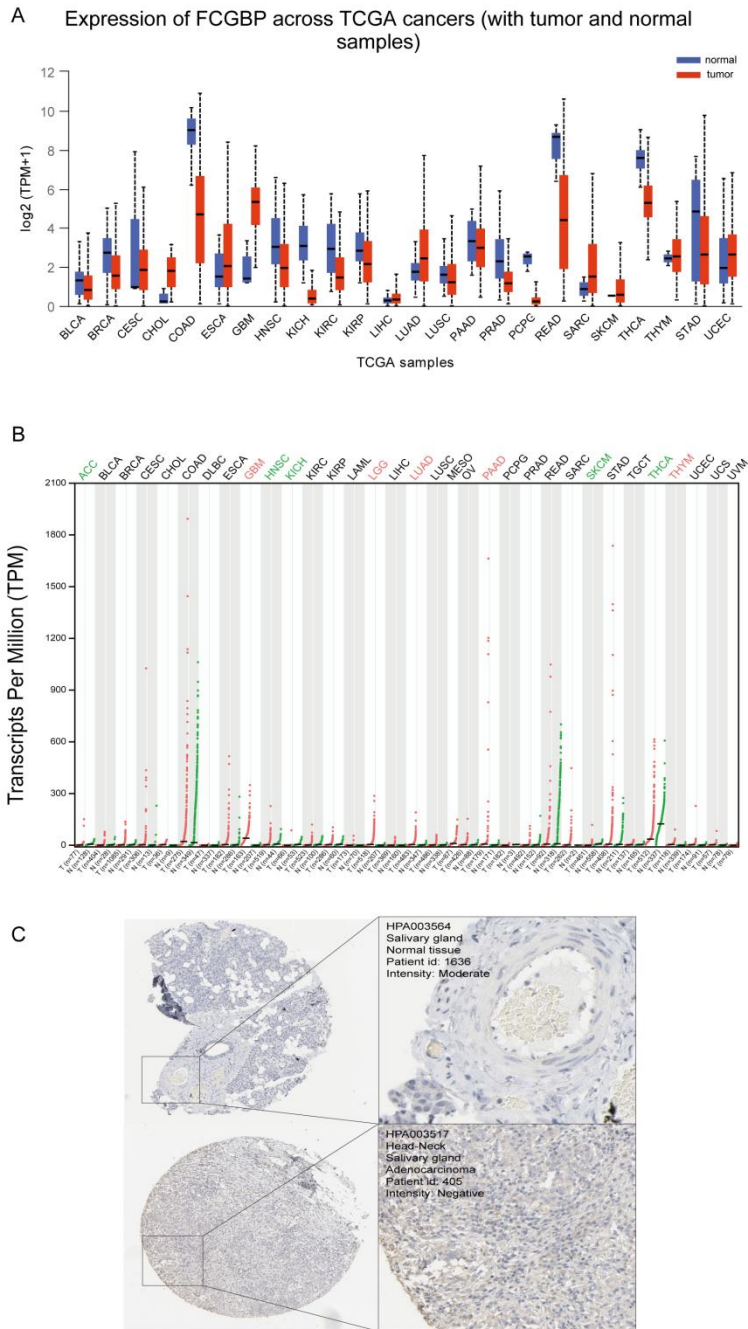

Figure S1: Expression analysis and survival analysis for FCGBP in pan-cancer by UALCAN and GEPIA. (A) The expression of FCGBP in pan-cancer based on TCGA cancer and normal data analyzed using UALCAN. (B) The expression of FCGBP in pan-cancer based on TCGA cancer and normal data analyzed using UALCAN using

the GEPIA database. \*p value < 0.05; \*\*p value < 0.01; \*\*\*p value < 0.001. (C)  
Immunohistochemistry results of FCGBP in cancer and normal tissues from the  
Human Protein Atlas database.

Table S1: Predicted miRNAs by seven prediction programs.
